# Supplementary material for: Complete Genomic Sequence and Phylogenomics Analysis of Agrobacterium Strain AB2/73: A New Rhizobium Species with a Unique mega-Ti Plasmid
Source: Research Square preprint supplement (doi:10.21203/rs.3.rs-635723/v1), 2021-06-22
Supplement: Supplementary file 1 [file 289ea62b7833dc353a659d03.xlsx]

## Sheet: Sheet2
Table S5. Presence or absence of a vir-box sequence upstream of the virA gene
Accession	Plasmid name	Vir-box present
NC_002575	pRi-1724	No
NC_011982	pTi-S4	No
NZ_CM016551	pTi-CFBP4996	No
NZ_CP019703	pRi-2659	No
NZ_CP039694	pTi-CFBP5473	No
NZ_JABFNP010000003	pTi-K306	No
CP067074	pTiAB2/73	No
KX388535	pTi-EU6	Yes
KX388536	pTi-Chry5	Yes
MF511177	pTi-C5.7	Yes
MK318986	pTi-C6.5	Yes
MK439381	pTi-Sule1	Yes
MK439382	pTi-CFBP2178	Yes
MK439383	pTi-CFBP1935	Yes
MK439384	pTi-Kerr108	Yes
MK439385	pTi-Kerr27	Yes
MK439386	pTi-T37	Yes
NC_002147	pTi-SAKURA	Yes
NC_003065	pTi-C58	Yes
NC_010929	pTi-Bo542	Yes
NZ_CM016546	pTi-CFBP5507	Yes
NZ_CM016547	pTi-CFBP5477	Yes
NZ_CP007228	pTi-LBA4213	Yes
NZ_CP011249	pTi-Ach5	Yes
NZ_CP029048	pTi-183	Yes
NZ_CP030831	pTi-NCHU2750	Yes
NZ_CP032920	pTi-15955	Yes
NZ_CP032925	pTi-1D1108	Yes
NZ_CP032929	pTi-1D1460	Yes
NZ_CP033026	pTi-1D132	Yes
NZ_CP033030	pTi-A6	Yes
NZ_CP039893	pTi-CFBP5499	Yes
NZ_CP039902	pTi-CFBP5877	Yes
NZ_CP039927	pTi-CFBP7129	Yes
NZ_CP042277	pTi-186	Yes
NZ_JAAMDI010000041.1	pRi-8196	Yes
B6_pTi	pTi-B6-LBA1	Yes
CFBP_1935_pTi	pTi-CFBP1935-LBA8790	Yes
CFBP_2178_pTi	pTi-CFBP2178-LBA8670	Yes
Chernin_681_pTi	pTi-Chernin681-LBA8760	Yes
IIB_pTi_T-DNA_fix	pTi-IIB-LBA701	Yes
NCPPB_396_pTi	pTi-NCPPB396-LBA8561	Yes
NCPPB_925_pTi	pTi-NCPPB925-LBA8350	Yes
CP044124	pRi-1855	Yes
